# Supplementary material for: Temperature-dependent catalytic reduction of 4-nitrophenol based on silver nanoclusters protected by a thermo-responsive copolymer ligand
Source: Royal Society of Chemistry journal article supplement (doi:10.1039/c5ra23158b), 2016-01-01
Supplement: c5ra23158b1.pdf [file c5ra23158b1.pdf]

## Electronic supplementary information for

### Temperature-dependent catalytic reduction of 4-nitrophenol based on silver nanoclusters protected by thermo-responsive copolymer ligand

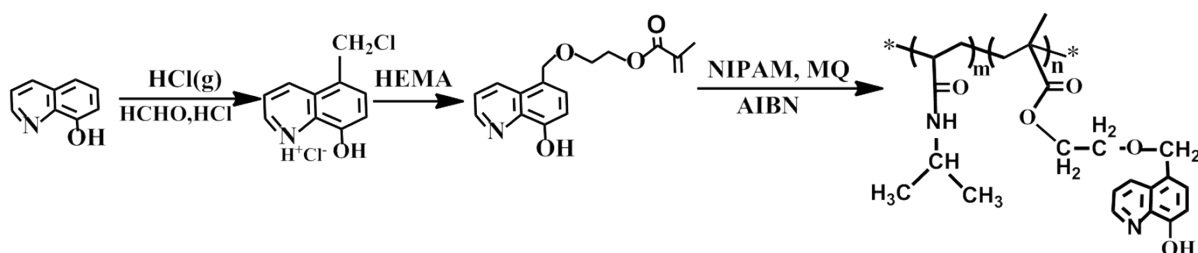

Fig.S1. Synthetic route of CPL.

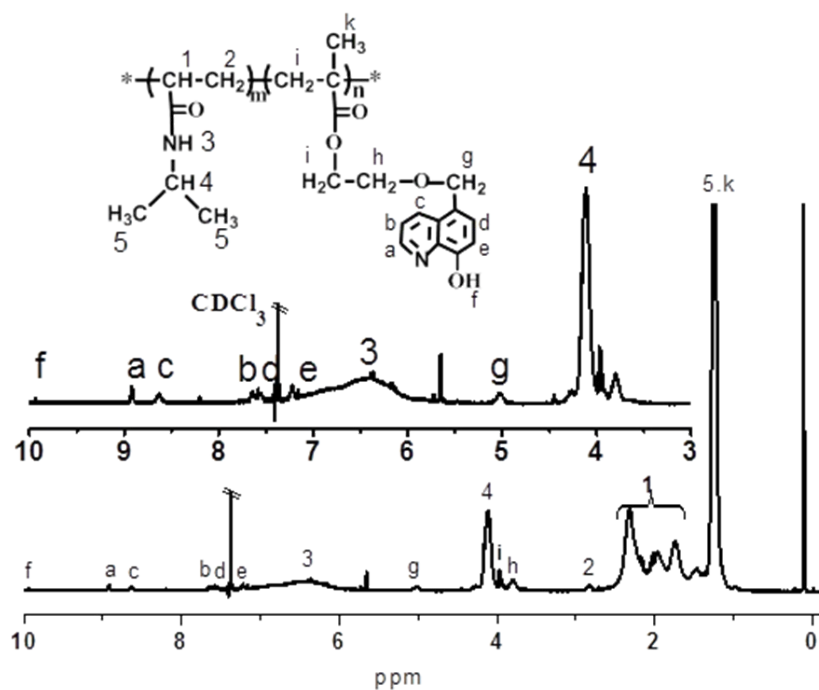

Fig. S2. <sup>1</sup>H-NMR spectra of CPL in CDCl<sub>3</sub>.

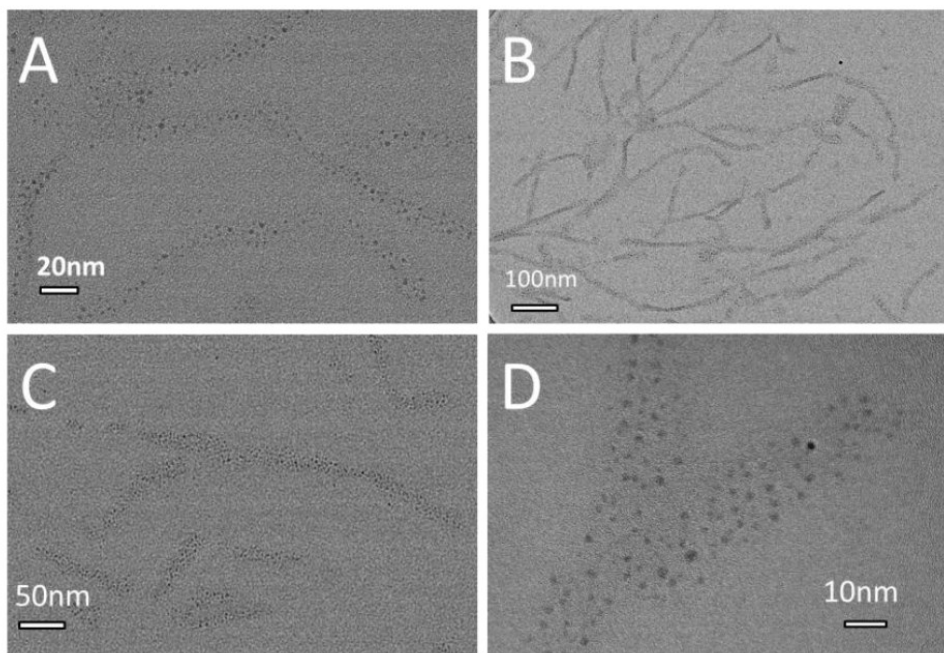

**Fig. S3.** TEM images of Ag NCs-a3 (A, B) and Ag NCs-a2 (C, D).

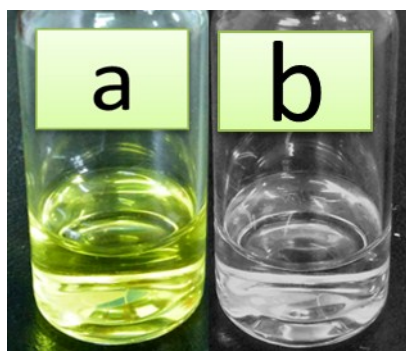

**Fig. S4.** Digital images of 4-nitrophenol before (a) and after (b) reduction.
